# Supplementary material for: Peripheral CD4+ T cell subsets and antibody response in COVID-19 convalescent individuals
Source: JCI journal article supplement (doi:10.1172/jci141054), 2020-08-25
Supplement: sd3 [file 3]

301 Moved Permanently

# Moved Permanently

The document has moved here.
