# Supplementary figures and images for: Peripheral CD4+ T cell subsets and antibody response in COVID-19 convalescent individuals
Source: JCI journal article supplement (doi:10.1172/jci141054), 2020-08-25

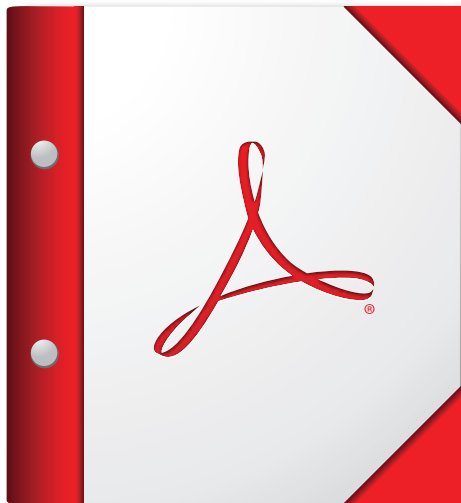

为获得最佳体验，请在 **Acrobat 9、Adobe Reader 9**  
或更高版本中打开此 **PDF** 包。

[立即下载 Adobe Reader!](#)

Supplement: sd3 [file 3]
